# Supplementary material for: Combining the uniform design-based ray procedure with combination index to investigate synergistic lethal toxicities of ternary mixtures on Caenorhabditis elegans
Source: Royal Society of Chemistry journal article supplement (doi:10.1039/c6ay00582a), 2016-01-01
Supplement: c6ay00582a1.pdf [file c6ay00582a1.pdf]

# Combining the uniform design-based ray procedure with combination index to investigate synergistic lethal toxicities of ternary mixtures on *Caenorhabditis elegans*

Han-Xiao Tang,<sup>a</sup> Shu-Shen Liu,<sup>\*a</sup> Kai Li<sup>a</sup> and Li Feng<sup>a</sup>

(Key Laboratory of Yangtze River Water Environment, Ministry of Education, College of Environmental Science and Engineering, Tongji University, Shanghai 200092)

## Supporting Information

### Contents

- Table S1 The properties of five chemicals and the concentrations of stocks
- Table S2 Fitting regression coefficients ( $\alpha$  and  $\beta$ ), statistics ( $R^2$  and RMSE),  $LC_{50}$  and its 95% confidence intervals, and  $pLC_{50}$  of five chemicals
- Table S3 The concentration ratios ( $p_i$ ) of various components in 20 rays from Table 1 and concentrations of stocks
- Table S4 The concentration ratios ( $p_i$ ) and concentrations ( $C_i$ ) of various components and stocks for four fixed NOEC ratio rays
- Table S5 Toxicological interactions of 20 rays designed by UD-Ray at five effects
- Table S6 Toxicological interactions of four fixed NOEC ratio rays at five effects
- Figure S1 Molecular structures of two pesticides and two ionic liquids
- Figure S2 Concentration-response relationships of 20 rays designed by UD-Ray in four mixture system
- Figure S3 Concentration-response relationships of four fixed NOEC ratio rays

Table S1 The properties of five chemicals and the concentrations of stocks\*

| Abbr.             | Chemical                             | CAS RN     | Solubility (g/L) | MW (g/mol) | Purity (%) | Stock (mol/L) |
|-------------------|--------------------------------------|------------|------------------|------------|------------|---------------|
| CuSO <sub>4</sub> | Copper sulfate                       | 7758-98-7  | 203              | 159.61     | 99.0       | 1.2531E-02    |
| DIC               | Dichlorvos                           | 62-73-7    | 8                | 220.98     | 98.8       | 3.6202E-02    |
| GLY               | Glyphosate                           | 1071-83-6  | 10.5             | 169.07     | 99.7       | 2.3659E-02    |
| [hmim]Br          | 1-hexyl-3-methylimidazolium bromide  | 85100-78-3 | Soluble          | 247.18     | 99.0       | 4.0456E-02    |
| [omim]Cl          | 3-methyl-1-octylimidazolium chloride | 64697-40-1 | Soluble          | 230.78     | 99.0       | 4.3331E-02    |

\*MW: Molecular weight

Table S2 Fitting regression coefficients ( $\alpha$  and  $\beta$ ), statistics ( $R^2$  and RMSE), LC<sub>50</sub> and its 95% confidence intervals, and pLC<sub>50</sub> of five chemicals

| Chemical          | Function | Regression coefficients and statistics |         |        |        | LC <sub>50</sub> and its 95% confidence intervals (mol/L) |              |             | pLC <sub>50</sub> |
|-------------------|----------|----------------------------------------|---------|--------|--------|-----------------------------------------------------------|--------------|-------------|-------------------|
|                   |          | $\alpha$                               | $\beta$ | $R^2$  | RMSE   | Lower limit                                               | Fitted value | Upper limit |                   |
| CuSO <sub>4</sub> | Logit    | 23.96                                  | 7.68    | 0.9946 | 0.0170 | 7.186E-04                                                 | 7.589E-04    | 8.036E-04   | 3.120             |
| DIC               | Weibull  | 12.75                                  | 5.84    | 0.9796 | 0.0422 | 4.961E-03                                                 | 5.676E-03    | 6.433E-03   | 2.246             |
| GLY               | Weibull  | 6.79                                   | 2.58    | 0.9802 | 0.0352 | 1.317E-03                                                 | 1.683E-03    | 2.137E-03   | 2.774             |
| [hmim]Br          | Logit    | 14.46                                  | 6.50    | 0.9828 | 0.0373 | 5.154E-03                                                 | 5.962E-03    | 6.974E-03   | 2.225             |
| [omim]Cl          | Weibull  | 7.11                                   | 2.74    | 0.9753 | 0.0400 | 1.434E-03                                                 | 1.868E-03    | 2.391E-03   | 2.729             |

Table S3 The concentration ratios ( $p_i$ ) of various components in 20 rays from Table 1 and concentrations of stocks

| No. | Mixture ray                        | $p_i$ (%)         |        |        |                   | Stock (mol/L)    |
|-----|------------------------------------|-------------------|--------|--------|-------------------|------------------|
|     |                                    | CuSO <sub>4</sub> | DIC    | GLY    | [hmim]Br [omim]Cl |                  |
| 1   | CuSO <sub>4</sub> -DIC-[hmim]Br-R1 | 0.0465            | 0.4302 |        | 0.5233            | 2.603E-02        |
| 2   | CuSO <sub>4</sub> -DIC-[hmim]Br-R2 | 0.0606            | 0.6085 |        | 0.3310            | 2.450E-02        |
| 3   | CuSO <sub>4</sub> -DIC-[hmim]Br-R3 | 0.0696            | 0.3195 |        | 0.6109            | 2.239E-02        |
| 4   | CuSO <sub>4</sub> -DIC-[hmim]Br-R4 | 0.0774            | 0.5027 |        | 0.4199            | 2.198E-02        |
| 5   | CuSO <sub>4</sub> -DIC-[hmim]Br-R5 | 0.0612            | 0.4578 |        | 0.4809            | 2.391E-02        |
| 6   | CuSO <sub>4</sub> -DIC-[omim]Cl-R1 | 0.0771            | 0.7130 |        |                   | 0.2099 2.408E-02 |
| 7   | CuSO <sub>4</sub> -DIC-[omim]Cl-R2 | 0.0847            | 0.8505 |        | 0.0648            | 2.250E-02        |
| 8   | CuSO <sub>4</sub> -DIC-[omim]Cl-R3 | 0.1243            | 0.5704 |        | 0.3053            | 1.903E-02        |
| 9   | CuSO <sub>4</sub> -DIC-[omim]Cl-R4 | 0.1167            | 0.7582 |        | 0.1251            | 1.924E-02        |
| 10  | CuSO <sub>4</sub> -DIC-[omim]Cl-R5 | 0.0914            | 0.6836 |        | 0.2250            | 2.224E-02        |
| 11  | CuSO <sub>4</sub> -GLY-[hmim]Br-R1 | 0.0725            |        | 0.1129 | 0.8146            | 2.195E-02        |
| 12  | CuSO <sub>4</sub> -GLY-[hmim]Br-R2 | 0.1108            |        | 0.2836 | 0.6056            | 1.906E-02        |
| 13  | CuSO <sub>4</sub> -GLY-[hmim]Br-R3 | 0.0970            |        | 0.0516 | 0.8513            | 1.908E-02        |
| 14  | CuSO <sub>4</sub> -GLY-[hmim]Br-R4 | 0.1280            |        | 0.1772 | 0.6948            | 1.720E-02        |
| 15  | CuSO <sub>4</sub> -GLY-[hmim]Br-R5 | 0.0903            |        | 0.2003 | 0.7094            | 2.055E-02        |
| 16  | CuSO <sub>4</sub> -GLY-[omim]Cl-R1 | 0.1894            |        | 0.2952 |                   | 0.5154 1.545E-02 |
| 17  | CuSO <sub>4</sub> -GLY-[omim]Cl-R2 | 0.2312            |        | 0.5918 |                   | 0.1770 1.332E-02 |
| 18  | CuSO <sub>4</sub> -GLY-[omim]Cl-R3 | 0.2508            |        | 0.1335 |                   | 0.6157 1.241E-02 |
| 19  | CuSO <sub>4</sub> -GLY-[omim]Cl-R4 | 0.2893            |        | 0.4005 |                   | 0.3102 1.109E-02 |
| 20  | CuSO <sub>4</sub> -GLY-[omim]Cl-R5 | 0.1761            |        | 0.3905 |                   | 0.4334 1.634E-02 |

Table S4 The concentration ratios ( $p_i$ ) and concentrations ( $C_i$ ) of various components and stocks for four fixed NOEC ratio rays

| No | Mixture ray (X-Y-Z-FR)             | $p_i$ (%) |        |        | $C_x$ (mol/L) | $C_y$ (mol/L) | $C_z$ (mol/L) | Stock (mol/L) |
|----|------------------------------------|-----------|--------|--------|---------------|---------------|---------------|---------------|
|    |                                    | X         | Y      | Z      |               |               |               |               |
| 21 | CuSO <sub>4</sub> -DIC-[hmim]Br-FR | 0.0702    | 0.4596 | 0.4701 | 1.596E-03     | 1.044E-02     | 1.068E-02     | 2.272E-02     |
| 22 | CuSO <sub>4</sub> -DIC-[omim]Cl-FR | 0.1216    | 0.7955 | 0.0829 | 2.273E-03     | 1.487E-02     | 1.550E-03     | 1.869E-02     |
| 23 | CuSO <sub>4</sub> -GLY-[hmim]Br-FR | 0.1215    | 0.0653 | 0.8132 | 2.089E-03     | 1.122E-03     | 1.398E-02     | 1.720E-02     |
| 24 | CuSO <sub>4</sub> -GLY-[omim]Cl-FR | 0.4506    | 0.2421 | 0.3073 | 3.423E-03     | 1.839E-03     | 2.334E-03     | 7.597E-03     |

\* X, Y and Z represents three components in ternary mixtures respectively.

Table S5 Toxicological interactions of 20 rays designed by UD-Ray at five effects

| No | Mixture system                  | Ray | x=0.1 | x=0.3 | x=0.5 | x=0.7 | x=0.9 |
|----|---------------------------------|-----|-------|-------|-------|-------|-------|
| 1  | CuSO <sub>4</sub> -DIC-[hmim]Br | R1  | SYN   | SYN   | SYN   | SYN   | SYN   |
| 2  |                                 | R2  | SYN   | SYN   | SYN   | SYN   | SYN   |
| 3  |                                 | R3  | SYN   | SYN   | SYN   | SYN   | SYN   |
| 4  |                                 | R4  | SYN   | SYN   | SYN   | SYN   | SYN   |
| 5  |                                 | R5  | SYN   | SYN   | SYN   | SYN   | SYN   |
| 6  | CuSO <sub>4</sub> -DIC-[omim]Cl | R1  | ADD   | ADD   | SYN   | SYN   | SYN   |
| 7  |                                 | R2  | ADD   | ADD   | SYN   | SYN   | SYN   |
| 8  |                                 | R3  | ADD   | SYN   | SYN   | SYN   | SYN   |
| 9  |                                 | R4  | ADD   | SYN   | SYN   | SYN   | SYN   |
| 10 |                                 | R5  | SYN   | SYN   | SYN   | SYN   | SYN   |
| 11 | CuSO <sub>4</sub> -GLY-[hmim]Br | R1  | ADD   | SYN   | SYN   | SYN   | SYN   |
| 12 |                                 | R2  | ADD   | SYN   | SYN   | SYN   | SYN   |
| 13 |                                 | R3  | SYN   | SYN   | SYN   | SYN   | SYN   |
| 14 |                                 | R4  | ADD   | SYN   | SYN   | SYN   | SYN   |
| 15 |                                 | R5  | SYN   | SYN   | SYN   | SYN   | SYN   |
| 16 | CuSO <sub>4</sub> -GLY-[omim]Cl | R1  | ANT   | ANT   | ADD   | SYN   | SYN   |
| 17 |                                 | R2  | ANT   | ANT   | ADD   | ADD   | SYN   |
| 18 |                                 | R3  | ADD   | SYN   | SYN   | SYN   | SYN   |
| 19 |                                 | R4  | ANT   | ANT   | ADD   | SYN   | SYN   |
| 20 |                                 | R5  | ANT   | ANT   | ADD   | ADD   | SYN   |

\* ADD, ANT and SYN refer to the additive action, antagonism and synergism, respectively.

Table S6 Toxicological interactions of four fixed NOEC ratio rays at five effects

| No | Mixture ray                        | x=0.1 | x=0.3 | x=0.5 | x=0.7 | x=0.9 |
|----|------------------------------------|-------|-------|-------|-------|-------|
| 21 | CuSO <sub>4</sub> -DIC-[hmim]Br-FR | ADD   | SYN   | SYN   | SYN   | SYN   |
| 22 | CuSO <sub>4</sub> -DIC-[omim]Cl-FR | ADD   | SYN   | SYN   | SYN   | SYN   |
| 23 | CuSO <sub>4</sub> -GLY-[hmim]Br-FR | ADD   | ADD   | SYN   | SYN   | SYN   |
| 24 | CuSO <sub>4</sub> -GLY-[omim]Cl-FR | ADD   | SYN   | SYN   | SYN   | ADD   |

\* ADD, ANT and SYN refer to the additive action, antagonism and synergism, respectively.

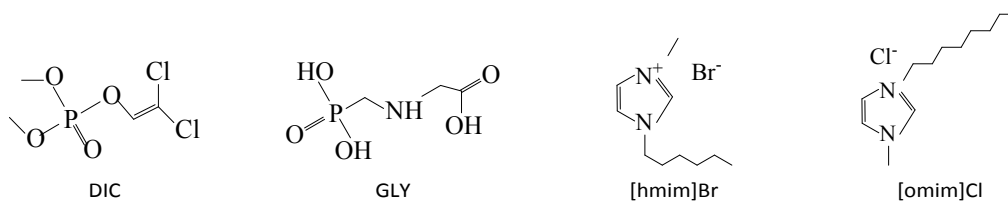

Figure S1 Molecular structures of two pesticides and two ionic liquids

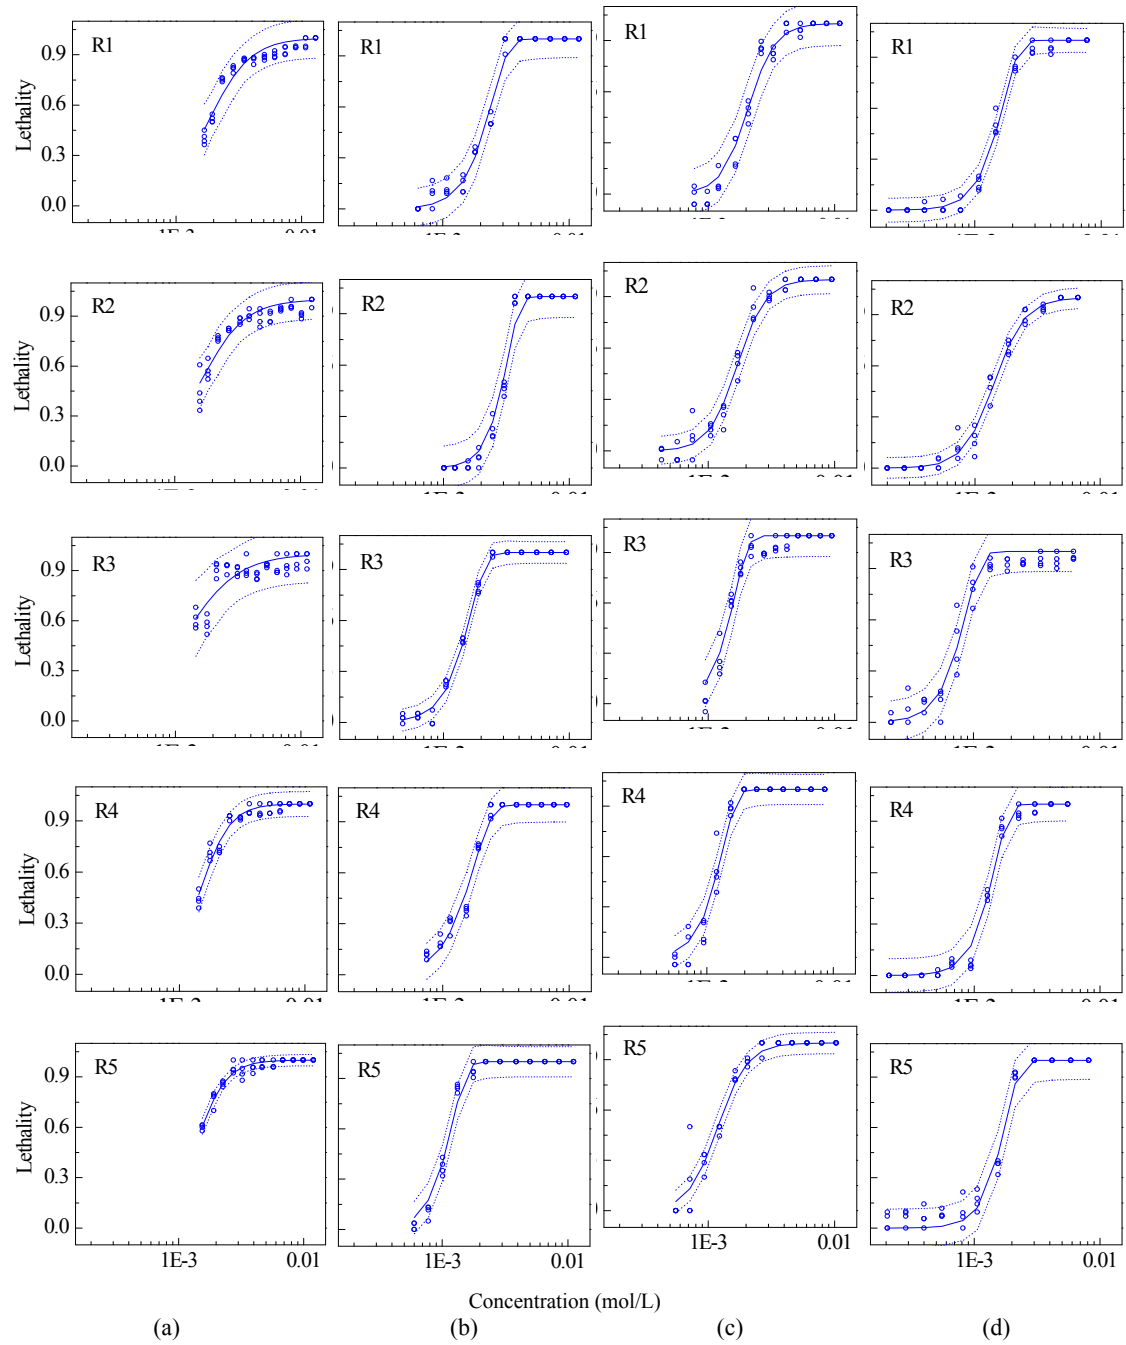

Figure S2 Concentration-response relationships of 20 rays designed by UD-Ray in four mixture system, (a)  $\text{CuSO}_4$ -DIC-[hmim]Br system, (b)  $\text{CuSO}_4$ -DIC-[omim]Cl system, (c)  $\text{CuSO}_4$ -GLY-[hmim]Br system, and (d)  $\text{CuSO}_4$ -GLY-[omim]Cl system. ( $\circ$ : experimental lethality at 24 h; —: fitted curve; ---: 95% confidence intervals)

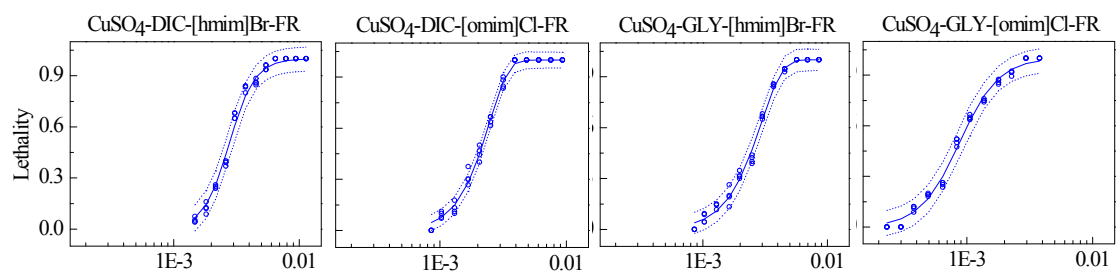

Concentration (mol/L)

Figure S3 Concentration-response relationships of four fixed NOEC ratio rays.  
( $\alpha$ : experimental lethality at 24 h; —: fitted curve; ---: 95% confidence intervals)
